# Supplementary material for: Isoliquiritigenin induces apoptosis and autophagy and inhibits endometrial cancer growth in mice
Source: PubMed Central journal article supplement (PMC5341989; doi:10.18632/oncotarget.12369), 2016-09-30
Supplement: oncotarget-07-73432-s001.pdf [file oncotarget-07-73432-s001.pdf]

## Isoliquiritigenin induces apoptosis and autophagy and inhibits endometrial cancer growth in mice

### Supplementary Materials

**Supplementary Table S1: Antibody used in this manuscript**

| Antibody name                 | No.        | Ratio                       | Brand                            |
|-------------------------------|------------|-----------------------------|----------------------------------|
| LC3B                          | NB100-2220 | 1:1000                      | Novus Biologicals (CO, USA)      |
| SQSTM1/p62                    | GTX629890  | 1:1000                      | GeneTex (CA, USA)                |
| p21 Cip1                      | GTX629543  | 1:500                       | GeneTex (CA, USA)                |
| LC3B                          | #3868      | 1:3200 (IHC)                | Cell Signal Technology (MA, USA) |
| Caspase-3                     | #9662      | 1:1000                      | Cell Signal Technology (MA, USA) |
| Caspase-7                     | #9492      | 1:2000                      | Cell Signal Technology (MA, USA) |
| PARP                          | #9542      | 1:1000                      | Cell Signal Technology (MA, USA) |
| p-ERK1/2                      | #9101      | 1:1000                      | Cell Signal Technology (MA, USA) |
| ERK1/2                        | #9102      | 1:1000                      | Cell Signal Technology (MA, USA) |
| p-p53 (Ser15)                 | #9284      | 1:1000                      | Cell Signal Technology (MA, USA) |
| PCNA                          | #2586      | 1:1000 (WB)<br>1:4000 (IHC) | Cell Signal Technology (MA, USA) |
| HRP-conjugated GAPDH          | HRP-60004  | 1:10000                     | Proteintech (IL, USA)            |
| Goat anti-rabbit antibody IgG | ab6721     | 1:10000                     | Abcam (MA, USA)                  |
| Goat anti-mouse antibody IgG  | ab6789     | 1:10000                     | Abcam (MA, USA)                  |
| Caspase-7                     | ab69540    | 1:100 (IHC)                 | Abcam (MA, USA)                  |
| SQSTM1/p62                    | ab56416    | 1:1000 (IHC)                | Abcam (MA, USA)                  |
| p-γH2AX (Ser139)              | 05-636     | 1:1000                      | EMD Millipore (MA, USA)          |
